# Supplementary material for: SARS-CoV-2 antibody prevalence in England following the first peak of the pandemic
Source: PubMed Central journal article supplement (PMC7876103; doi:10.1038/s41467-021-21237-w), 2021-02-10

# Supplementary Information

Ward H, Atchison C, Whitaker M et al. December 2020

## Contents

|                                                                                                                                                   |    |
|---------------------------------------------------------------------------------------------------------------------------------------------------|----|
| Supplementary Table 1: Prevalence of SARS-CoV-2 IgG antibodies, adults in England, by sociodemographic characteristics                            | 2  |
| Supplementary Table 2: Prevalence of SARS-CoV-2 IgG antibodies, adults in England, by detailed ethnicity categories                               | 3  |
| Supplementary Figure 1: Logistic regression for SARS-CoV-2 antibodies: adjusted Odds Ratios (95% CI) for sociodemographic and clinical covariates | 4  |
| Supplementary Table 3: Prevalence of SARS-CoV-2 IgG antibodies, adults in England, by individual and clinical characteristics                     | 6  |
| Supplementary Table 4: Prevalence of SARS-CoV-2 IgG antibodies, adults in England, by household income and age                                    | 8  |
| Supplementary Table 5 Infection Fatality Ratio sensitivity analyses including care home residents and all excess deaths                           | 9  |
| Supplementary Methods                                                                                                                             | 10 |
| Weighting strategy                                                                                                                                | 10 |
| Sample profile                                                                                                                                    | 10 |
| Sampling frame, response and weighting                                                                                                            | 11 |
| Study response rates                                                                                                                              | 11 |
| Regions of England                                                                                                                                | 12 |
| Selected characteristics of Regions of England                                                                                                    | 12 |
| Map showing Regions of England with prevalence of SARS-CoV-2 antibody                                                                             | 13 |
| Missing data                                                                                                                                      | 14 |

Supplementary Table 1: Prevalence of SARS-CoV-2 IgG antibodies, adults in England, by sociodemographic characteristics

|                                              | Total tests<br>with valid results | Total<br>antibody<br>positive | Crude prevalence %<br>[95% confidence<br>intervals] | Prevalence %<br>adjusted for test*<br>[95% confidence<br>intervals] | Prevalence %<br>adjusted* and<br>weighted <sup>†</sup><br>[95% confidence<br>intervals] |
|----------------------------------------------|-----------------------------------|-------------------------------|-----------------------------------------------------|---------------------------------------------------------------------|-----------------------------------------------------------------------------------------|
| England                                      | 99908                             | 5544                          | 5.6 [5.4-5.7]                                       | 5.0 [4.8-5.2]                                                       | 6.0 [5.8-6.1]                                                                           |
| <b>Sex</b>                                   |                                   |                               |                                                     |                                                                     |                                                                                         |
| Male                                         | 43825                             | 2405                          | 5.5 [5.3-5.7]                                       | 4.9 [4.7-5.2]                                                       | 6.2 [5.9-6.4]                                                                           |
| Female                                       | 56083                             | 3139                          | 5.6 [5.4-5.8]                                       | 5.1 [4.8-5.3]                                                       | 5.8 [5.5-6.0]                                                                           |
| <b>Age</b>                                   |                                   |                               |                                                     |                                                                     |                                                                                         |
| 18-24                                        | 6499                              | 463                           | 7.1 [6.5-7.8]                                       | 6.9 [6.2-7.7]                                                       | 7.9 [7.3-8.5]                                                                           |
| 25-34                                        | 13366                             | 930                           | 7.0 [6.5-7.4]                                       | 6.7 [6.2-7.2]                                                       | 7.8 [7.4-8.3]                                                                           |
| 35-44                                        | 17052                             | 964                           | 5.7 [5.3-6.0]                                       | 5.1 [4.7-5.6]                                                       | 6.1 [5.7-6.6]                                                                           |
| 45-54                                        | 20634                             | 1255                          | 6.1 [5.8-6.4]                                       | 5.6 [5.3-6.0]                                                       | 6.4 [6.0-6.9]                                                                           |
| 55-64                                        | 20404                             | 1131                          | 5.5 [5.2-5.9]                                       | 5.0 [4.6-5.4]                                                       | 5.9 [5.5-6.4]                                                                           |
| 65-74                                        | 15543                             | 568                           | 3.7 [3.4-4.0]                                       | 2.7 [2.4-3.1]                                                       | 3.2 [2.8-3.6]                                                                           |
| 75+                                          | 6410                              | 233                           | 3.6 [3.2-4.1]                                       | 2.7 [2.2-3.3]                                                       | 3.3 [2.9-3.8]                                                                           |
| <b>Ethnicity</b>                             |                                   |                               |                                                     |                                                                     |                                                                                         |
| White                                        | 92737                             | 4827                          | 5.2 [5.1-5.3]                                       | 4.6 [4.4-4.8]                                                       | 5.0 [4.8-5.2]                                                                           |
| Mixed                                        | 1347                              | 106                           | 7.9 [6.5-9.4]                                       | 7.8 [6.2-9.7]                                                       | 8.9 [7.1-11.1]                                                                          |
| Asian <sup>‡</sup>                           | 3658                              | 369                           | 10.1 [9.2-11.1]                                     | 10.5 [9.3-11.7]                                                     | 11.9 [11.0-12.8]                                                                        |
| Black <sup>§</sup>                           | 900                               | 135                           | 15.0 [12.8-17.5]                                    | 16.4 [13.8-19.4]                                                    | 17.3 [15.8-19.0]                                                                        |
| Other                                        | 762                               | 79                            | 10.4 [8.4-12.7]                                     | 10.8 [8.4-13.7]                                                     | 12.3 [10.2-14.7]                                                                        |
| <b>Deprivation<br/>Quintile<sup>  </sup></b> |                                   |                               |                                                     |                                                                     |                                                                                         |
| 1 most deprived                              | 10082                             | 682                           | 6.8 [6.3-7.3]                                       | 6.5 [5.9-7.1]                                                       | 7.3 [6.8-7.7]                                                                           |
| 2                                            | 16015                             | 947                           | 5.9 [5.6-6.3]                                       | 5.4 [5.0-5.9]                                                       | 6.4 [6.0-6.8]                                                                           |
| 3                                            | 21474                             | 1196                          | 5.6 [5.3-5.9]                                       | 5.0 [4.7-5.4]                                                       | 5.9 [5.5-6.3]                                                                           |
| 4                                            | 24840                             | 1287                          | 5.2 [4.9-5.5]                                       | 4.6 [4.2-4.9]                                                       | 5.2 [4.8-5.6]                                                                           |
| 5 least deprived                             | 27497                             | 1432                          | 5.2 [5.0-5.5]                                       | 4.6 [4.3-4.9]                                                       | 5.0 [4.6-5.4]                                                                           |
| <b>Household size</b>                        |                                   |                               |                                                     |                                                                     |                                                                                         |
| 1                                            | 15052                             | 720                           | 4.8 [4.5-5.1]                                       | 4.1 [3.7-4.5]                                                       | 4.7 [4.3-5.1]                                                                           |
| 2                                            | 36413                             | 1784                          | 4.9 [4.7-5.1]                                       | 4.2 [4.0-4.5]                                                       | 5.0 [4.7-5.3]                                                                           |
| 3                                            | 19734                             | 1158                          | 5.9 [5.5-6.2]                                       | 5.4 [5.0-5.8]                                                       | 6.5 [6.0-6.9]                                                                           |
| 4                                            | 19611                             | 1204                          | 6.1 [5.8-6.5]                                       | 5.7 [5.3-6.1]                                                       | 6.4 [6.0-6.8]                                                                           |
| 5                                            | 6403                              | 447                           | 7.0 [6.4-7.6]                                       | 6.7 [6.0-7.5]                                                       | 7.7 [7.0-8.5]                                                                           |
| 6                                            | 1848                              | 152                           | 8.2 [7.1-9.6]                                       | 8.2 [6.8-9.8]                                                       | 12.3 [10.8-14.0]                                                                        |
| 7+                                           | 827                               | 79                            | 9.6 [7.7-11.7]                                      | 9.8 [7.6-12.5]                                                      | 13.0 [11.0-15.3]                                                                        |
| <b>Region</b>                                |                                   |                               |                                                     |                                                                     |                                                                                         |
| North East                                   | 3574                              | 196                           | 5.5 [4.8-6.3]                                       | 4.9 [4.1-5.9]                                                       | 5.0 [4.3-5.9]                                                                           |
| North West                                   | 11996                             | 714                           | 6.0 [5.5-6.4]                                       | 5.5 [5.0-6.0]                                                       | 6.6 [6.1-7.2]                                                                           |
| Yorkshire                                    | 6519                              | 284                           | 4.4 [3.9-4.9]                                       | 3.6 [3.0-4.2]                                                       | 3.9 [3.5-4.5]                                                                           |
| East Midlands                                | 12684                             | 601                           | 4.7 [4.4-5.1]                                       | 4.0 [3.6-4.5]                                                       | 4.2 [3.7-4.8]                                                                           |
| West Midlands                                | 9620                              | 547                           | 5.7 [5.2-6.2]                                       | 5.2 [4.6-5.7]                                                       | 5.8 [5.3-6.4]                                                                           |
| East of England                              | 14433                             | 805                           | 5.6 [5.2-6.0]                                       | 5.0 [4.6-5.5]                                                       | 5.1 [4.6-5.6]                                                                           |
| London                                       | 9547                              | 1045                          | 10.9 [10.3-11.6]                                    | 11.5 [10.8-12.3]                                                    | 13.0 [12.3-13.6]                                                                        |
| South East                                   | 21979                             | 995                           | 4.5 [4.3-4.8]                                       | 3.8 [3.4-4.1]                                                       | 3.9 [3.5-4.3]                                                                           |
| South West                                   | 9556                              | 357                           | 3.7 [3.4-4.1]                                       | 2.8 [2.4-3.3]                                                       | 2.8 [2.4-3.3]                                                                           |

\*All estimates of prevalence adjusted for imperfect test sensitivity and specificity (see methods for details).

<sup>†</sup>Responses have been re-weighted to account for sample design and for variation in response rate (see methods for details).

<sup>‡</sup>Asian / Asian British

<sup>§</sup>Black / African / Caribbean / Black British

<sup>||</sup>Based on Index of Multiple Deprivation (2019) at lower super output area

Supplementary Table 2: Prevalence of SARS-CoV-2 IgG antibodies, adults in England, by detailed ethnicity categories

| Category                                              | Total antibody positive | Total tests (with valid results) | Prevalence % adjusted for test [95% confidence intervals] |
|-------------------------------------------------------|-------------------------|----------------------------------|-----------------------------------------------------------|
| <b>White</b>                                          |                         |                                  |                                                           |
| English / Welsh / Scottish / Northern Irish / British | 4415                    | 86790                            | 4.44 [4.27-4.62]                                          |
| Irish                                                 | 78                      | 968                              | 8.02 [6.15-10.29]                                         |
| Gypsy or Irish traveler                               | <5*                     | <50*                             | n/a                                                       |
| Any other White background                            | 333                     | 4947                             | 6.42 [5.62-7.31]                                          |
| <b>Mixed</b>                                          |                         |                                  |                                                           |
| White / Black Caribbean                               | 27                      | 321                              | 8.45 [5.36-12.72]                                         |
| White / Black African                                 | 12                      | 107                              | 11.83 [6.18-20.71]                                        |
| White and Asian                                       | 26                      | 396                              | 6.22 [3.76-9.69]                                          |
| Any other Mixed / Multiple ethnic background          | 41                      | 523                              | 7.76 [5.34-10.92]                                         |
| <b>Asian / Asian British</b>                          |                         |                                  |                                                           |
| Indian                                                | 177                     | 1847                             | 9.86 [8.34-11.58]                                         |
| Pakistani                                             | 54                      | 503                              | 11.25 [8.34-14.87]                                        |
| Bangladeshi                                           | 24                      | 189                              | 13.61 [8.78-20.24]                                        |
| Chinese                                               | 29                      | 410                              | 6.84 [4.30-10.33]                                         |
| Other Asian                                           | 85                      | 709                              | 12.76 [10.12-15.89]                                       |
| <b>Black / African / Caribbean / Black British</b>    |                         |                                  |                                                           |
| African                                               | 90                      | 519                              | 19.21 [15.57-23.42]                                       |
| Caribbean                                             | 38                      | 320                              | 12.62 [8.89-17.45]                                        |
| Other Black / African / Caribbean background          | 7                       | 61                               | 12.14 [5.15-24.63]                                        |
| <b>Other ethnic group</b>                             |                         |                                  |                                                           |
| Arab                                                  | 15                      | 168                              | 9.07 [4.92-15.43]                                         |
| Any other ethnic group                                | 64                      | 594                              | 11.29 [8.59-14.61]                                        |
| Prefer not to say                                     | 28                      | 479                              | 5.36 [3.22-8.34]                                          |

\*suppressed due to small numbers

Supplementary Figure 1: Logistic regression for SARS-CoV-2 antibodies: adjusted Odds Ratios (95% CI) for sociodemographic and clinical covariates

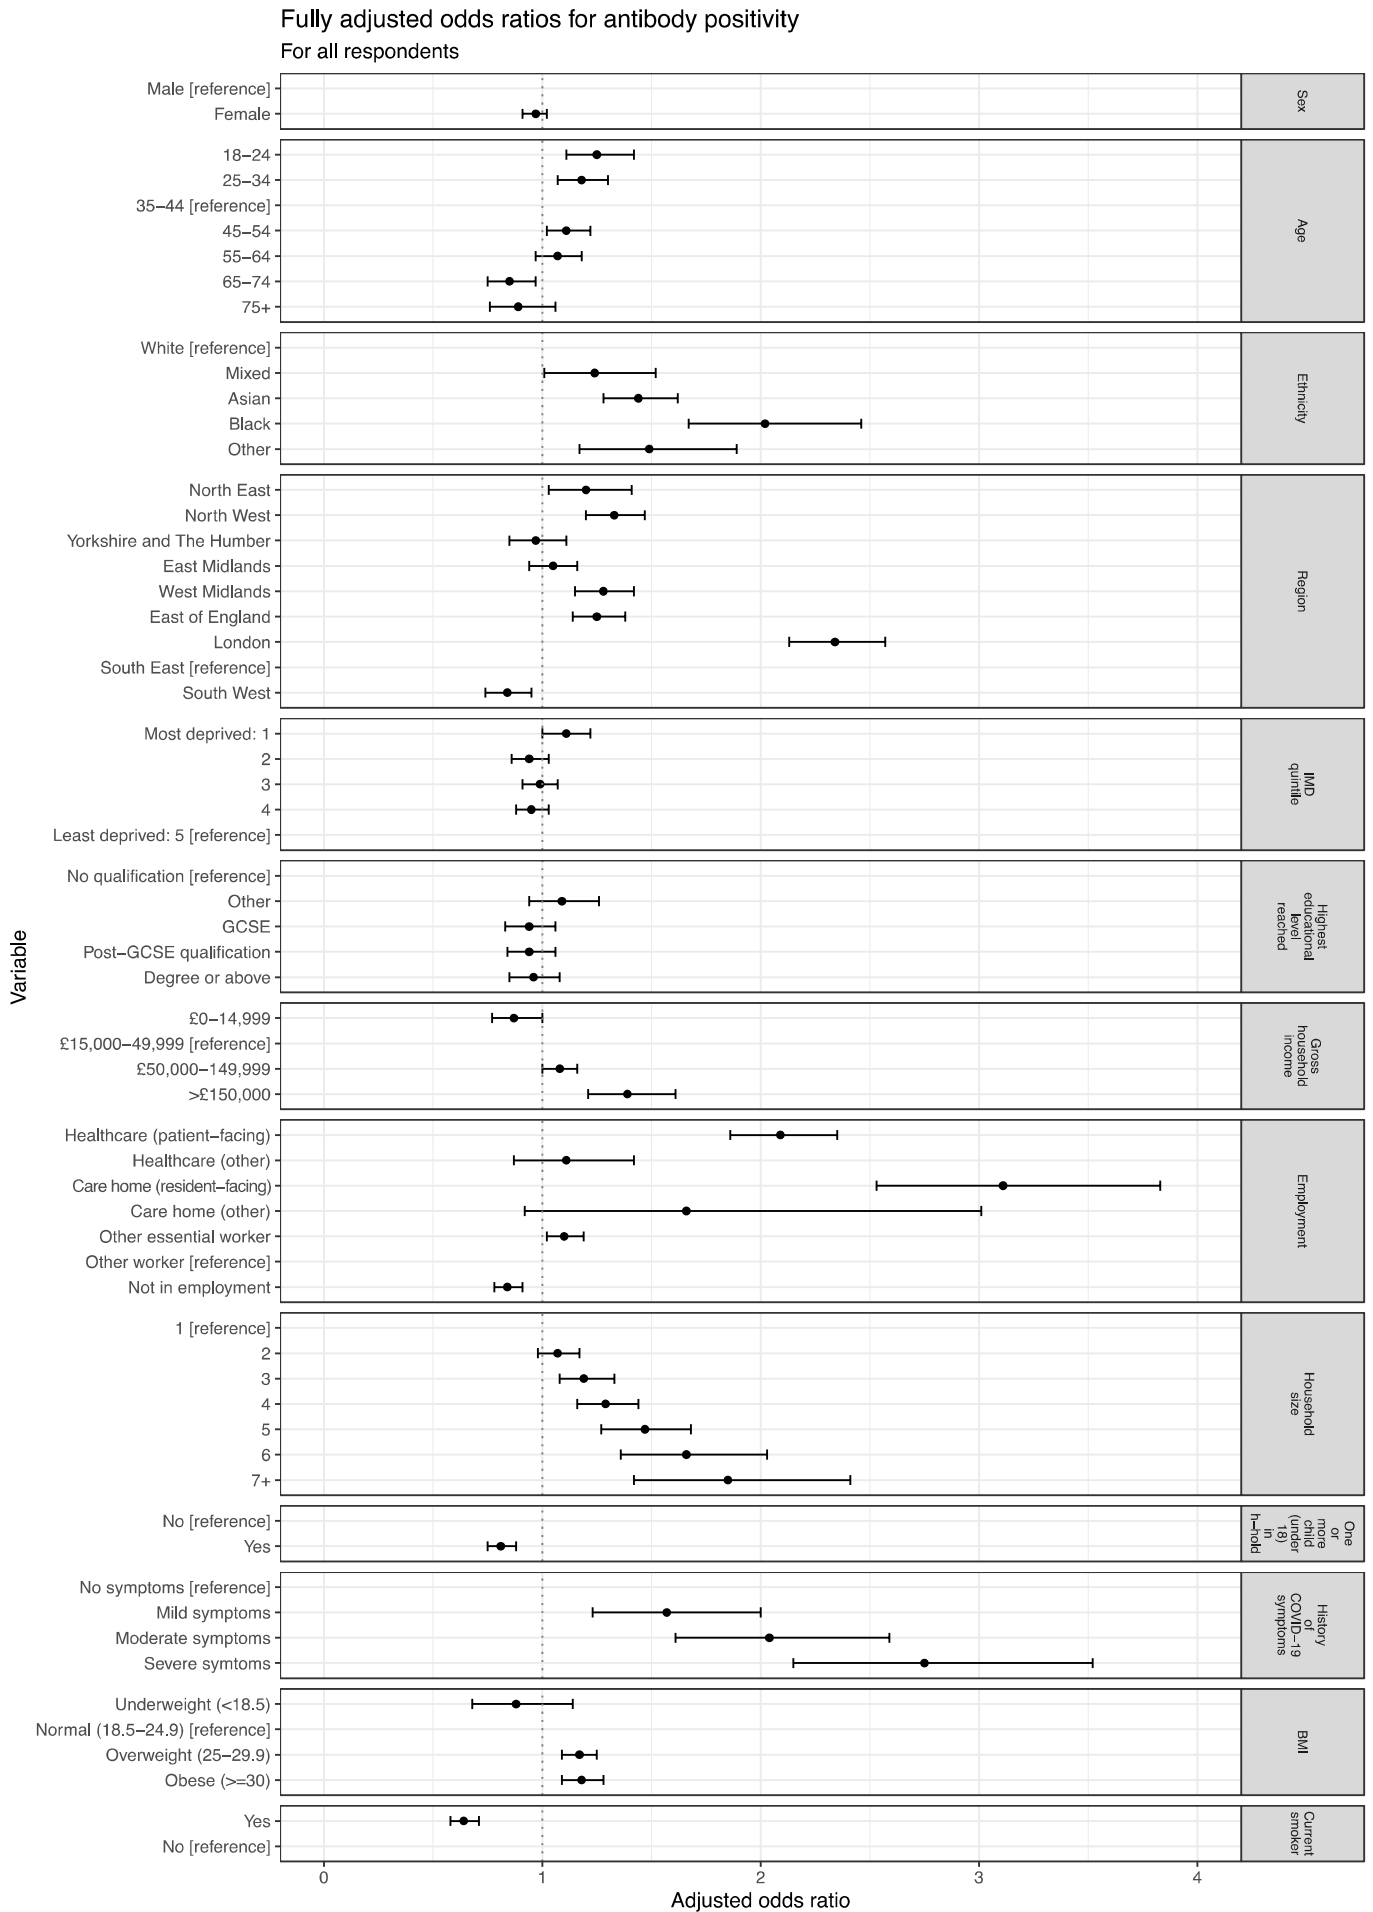

Legend: Jointly adjusted odds ratios [95% confidence intervals] from multivariable logistic regression for the covariate of interest. Jointly adjusted odds ratios were obtained from multivariable logistic regression adjusting for age, sex, ethnicity, region, index of multiple deprivation quintile, education, household income, employment, household size and child in house (y/n). For data see Table 2 and Supplementary Data 1.

Supplementary Table 3: Prevalence of SARS-CoV-2 IgG antibodies, adults in England, by individual and clinical characteristics

|                                                  | Total tests<br>(with valid results) | Total antibody<br>positive | Crude prevalence %<br>[95% confidence<br>intervals] | Prevalence % adjusted<br>for test*<br>[95% confidence<br>intervals] |
|--------------------------------------------------|-------------------------------------|----------------------------|-----------------------------------------------------|---------------------------------------------------------------------|
| <b>Employment</b>                                |                                     |                            |                                                     |                                                                     |
| Health care (patient-facing)                     | 3402                                | 379                        | 11.1 [10.1-12.2]                                    | 11.7 [10.5-13.1]                                                    |
| Health care (other)                              | 1151                                | 73                         | 6.3 [5.1-7.9]                                       | 6.0 [4.4-7.8]                                                       |
| Care home (client-facing)                        | 761                                 | 115                        | 15.1 [12.7-17.8]                                    | 16.5 [13.7-19.8]                                                    |
| Care home (other)                                | 146                                 | 12                         | 8.2 [4.8-13.8]                                      | 8.2 [4.1-15.0]                                                      |
| Other essential worker†                          | 19927                               | 1209                       | 6.1 [5.7-6.4]                                       | 5.6 [5.2-6.0]                                                       |
| Other worker‡                                    | 37855                               | 2189                       | 5.8 [5.6-6.0]                                       | 5.3 [5.0-5.6]                                                       |
| Not in employment                                | 35737                               | 1516                       | 4.2 [4.0-4.5]                                       | 3.4 [3.2-3.7]                                                       |
| <b>Maximum educational level</b>                 |                                     |                            |                                                     |                                                                     |
| Degree or above                                  | 9101                                | 420                        | 4.6 [4.2-5.1]                                       | 3.9 [3.4-4.4]                                                       |
| Post-GCSE qualification                          | 6758                                | 382                        | 5.7 [5.1-6.2]                                       | 5.1 [4.5-5.8]                                                       |
| GCSE                                             | 22204                               | 1135                       | 5.1 [4.8-5.4]                                       | 4.5 [4.1-4.8]                                                       |
| Other                                            | 27597                               | 1515                       | 5.5 [5.2-5.8]                                       | 4.9 [4.6-5.3]                                                       |
| No qualification                                 | 33751                               | 2062                       | 6.1 [5.9-6.4]                                       | 5.7 [5.4-6.0]                                                       |
| <b>Gross Household income</b>                    |                                     |                            |                                                     |                                                                     |
| £0-14,999                                        | 297                                 | 6482                       | 4.6 [4.1-5.1]                                       | 3.8 [3.2-4.5]                                                       |
| £15,000-49,999                                   | 1650                                | 31146                      | 5.3 [5.0-5.6]                                       | 4.7 [4.4-5.0]                                                       |
| £50,000-149,999                                  | 1707                                | 27252                      | 6.3 [6.0-6.6]                                       | 5.9 [5.5-6.2]                                                       |
| >£150,000                                        | 284                                 | 3216                       | 8.8 [7.9-9.9]                                       | 8.9 [7.8-10.2]                                                      |
| <b>Number children in household</b>              |                                     |                            |                                                     |                                                                     |
| 0                                                | 67515                               | 3647                       | 5.4 [5.2-5.6]                                       | 4.8 [4.6-5.0]                                                       |
| 1                                                | 14471                               | 851                        | 5.9 [5.5-6.3]                                       | 5.4 [5.0-5.9]                                                       |
| 2                                                | 13803                               | 808                        | 5.8 [5.5-6.3]                                       | 5.4 [4.9-5.8]                                                       |
| >2                                               | 4099                                | 238                        | 5.8 [5.1-6.6]                                       | 5.3 [4.5-6.2]                                                       |
| <b>History of COVID-19</b>                       |                                     |                            |                                                     |                                                                     |
| Positive PCR test                                | 341                                 | 277                        | 81.2 [76.7-85.0]                                    | 96.2 [90.8-100.0]                                                   |
| Suspected by doctor                              | 1144                                | 353                        | 30.9 [28.2-33.6]                                    | 35.5 [32.3-38.8]                                                    |
| Suspected by respondent                          | 17893                               | 3118                       | 17.4 [16.9-18.0]                                    | 19.3 [18.6-20.0]                                                    |
| No                                               | 80390                               | 1698                       | 2.1 [2.0-2.2]                                       | 0.9 [0.7-1.0]                                                       |
| <b>Symptoms</b>                                  |                                     |                            |                                                     |                                                                     |
| Appetite loss                                    | 5895                                | 1504                       | 25.5 [24.4-26.6]                                    | 29.1 [27.7-30.4]                                                    |
| Nausea/vomiting                                  | 2286                                | 516                        | 22.6 [20.9-24.3]                                    | 25.5 [23.5-27.6]                                                    |
| Diarrhoea                                        | 3048                                | 744                        | 24.4 [22.9-26.0]                                    | 27.7 [25.9-29.6]                                                    |
| Abdominal pain                                   | 2230                                | 452                        | 20.3 [18.7-22.0]                                    | 22.7 [20.8-24.8]                                                    |
| Runny nose                                       | 4327                                | 732                        | 16.9 [15.8-18.1]                                    | 18.7 [17.4-20.1]                                                    |
| Sneezing                                         | 3293                                | 550                        | 16.7 [15.5-18.0]                                    | 18.4 [16.9-20.0]                                                    |
| Blocked nose                                     | 4217                                | 743                        | 17.6 [16.5-18.8]                                    | 19.5 [18.2-21.0]                                                    |
| Sore eyes                                        | 2945                                | 610                        | 20.7 [19.3-22.2]                                    | 23.3 [21.6-25.1]                                                    |
| Loss of sense of smell                           | 4714                                | 2159                       | 45.8 [44.4-47.2]                                    | 53.5 [51.8-55.2]                                                    |
| Loss of sense of taste                           | 5247                                | 2212                       | 42.2 [40.8-43.5]                                    | 49.1 [47.5-50.7]                                                    |
| Sore throat                                      | 8994                                | 1336                       | 14.9 [14.1-15.6]                                    | 16.2 [15.3-17.1]                                                    |
| Hoarse voice                                     | 3376                                | 502                        | 14.9 [13.7-16.1]                                    | 16.2 [14.8-17.7]                                                    |
| Headache                                         | 10374                               | 2128                       | 20.5 [19.7-21.3]                                    | 23.0 [22.1-24.0]                                                    |
| Dizziness                                        | 3956                                | 824                        | 20.8 [19.6-22.1]                                    | 23.4 [21.9-25.0]                                                    |
| Shortness of breath                              | 6899                                | 1259                       | 18.2 [17.4-19.2]                                    | 20.3 [19.2-21.4]                                                    |
| New persistent cough                             | 9746                                | 1537                       | 15.8 [15.1-16.5]                                    | 17.3 [16.5-18.2]                                                    |
| Tight chest                                      | 6931                                | 1228                       | 17.7 [16.8-18.6]                                    | 19.7 [18.6-20.8]                                                    |
| Chest pain                                       | 3408                                | 590                        | 17.3 [16.1-18.6]                                    | 19.2 [17.7-20.7]                                                    |
| Fever                                            | 9128                                | 1906                       | 20.9 [20.1-21.7]                                    | 23.5 [22.5-24.5]                                                    |
| Chills                                           | 5329                                | 1233                       | 23.1 [22.0-24.3]                                    | 26.2 [24.8-27.6]                                                    |
| Difficulty sleeping                              | 5366                                | 930                        | 17.3 [16.3-18.4]                                    | 19.2 [18.0-20.4]                                                    |
| Tiredness                                        | 12246                               | 2626                       | 21.4 [20.7-22.2]                                    | 24.1 [23.3-25.0]                                                    |
| Severe fatigue                                   | 5089                                | 1256                       | 24.7 [23.5-25.9]                                    | 28.0 [26.6-29.5]                                                    |
| Numbness/tingling                                | 1446                                | 358                        | 24.8 [22.6-27.0]                                    | 28.1 [25.5-30.9]                                                    |
| Heavy arms/legs                                  | 5196                                | 1173                       | 22.6 [21.5-23.7]                                    | 25.5 [24.2-26.9]                                                    |
| Muscle aches                                     | 10205                               | 2236                       | 21.9 [21.1-22.7]                                    | 24.7 [23.8-25.7]                                                    |
| None of these symptoms                           | 74                                  | 6                          | 8.1 [3.8-16.6]                                      | 8.1 [2.9-18.3]                                                      |
| <b>Symptom severity</b>                          |                                     |                            |                                                     |                                                                     |
| None                                             | 683                                 | 87                         | 12.7 [10.4-15.4]                                    | 13.7 [10.9-16.9]                                                    |
| Mild symptoms                                    | 6071                                | 1025                       | 16.9 [16.0-17.8]                                    | 18.7 [17.5-19.8]                                                    |
| Moderate symptoms                                | 9261                                | 1850                       | 20.0 [19.2-20.8]                                    | 22.4 [21.4-23.4]                                                    |
| Severe symptoms                                  | 3501                                | 884                        | 25.2 [23.8-26.7]                                    | 28.7 [27.0-30.5]                                                    |
| <b>Contact with case</b>                         |                                     |                            |                                                     |                                                                     |
| Yes, with confirmed case                         | 3946                                | 742                        | 18.8 [17.6-20.1]                                    | 21.0 [19.5-22.5]                                                    |
| Yes, with suspected case                         | 5307                                | 896                        | 16.9 [15.9-17.9]                                    | 18.7 [17.5-19.9]                                                    |
| No, not to my knowledge                          | 90655                               | 3906                       | 4.3 [4.2-4.4]                                       | 3.5 [3.3-3.7]                                                       |
| <b>Number of pre-existing health conditions‡</b> |                                     |                            |                                                     |                                                                     |
| >1                                               | 22127                               | 1097                       | 5.0 [4.7-5.3]                                       | 4.3 [4.0-4.6]                                                       |
| 1                                                | 28308                               | 1558                       | 5.5 [5.2-5.8]                                       | 4.9 [4.6-5.3]                                                       |
| 0                                                | 49473                               | 2889                       | 5.8 [5.6-6.0]                                       | 5.3 [5.1-5.6]                                                       |
| <b>BMI§</b>                                      |                                     |                            |                                                     |                                                                     |
| Underweight (<18.5)                              | 1236                                | 65                         | 5.3 [4.1-6.6]                                       | 4.6 [3.3-6.3]                                                       |
| Normal (18.5-24.9)                               | 36191                               | 1919                       | 5.3 [5.1-5.5]                                       | 4.7 [4.4-5.0]                                                       |
| Overweight (25-29.9)                             | 31818                               | 1826                       | 5.7 [5.5-6.0]                                       | 5.2 [4.9-5.5]                                                       |
| Obese (≥30)                                      | 19855                               | 1161                       | 5.8 [5.5-6.2]                                       | 5.4 [5.0-5.8]                                                       |
| <b>Smoking (current)</b>                         |                                     |                            |                                                     |                                                                     |
| Yes                                              | 10635                               | 433                        | 4.1 [3.7-4.5]                                       | 3.2 [2.8-3.7]                                                       |
| No                                               | 88290                               | 5059                       | 5.7 [5.6-5.9]                                       | 5.2 [5.0-5.4]                                                       |

\*All estimates of prevalence adjusted for imperfect test sensitivity and specificity (see methods for details).

†Essential worker: List of essential workers as defined by the UK Government <https://www.gov.uk/guidance/coronavirus-covid-19-getting-tested#essential-workers>

§Other worker: Worker not working in health or social care or on the UK Government list of essential workers

‡Pre-existing health conditions included: organ transplant recipient, diabetes (type I or II), heart disease or heart problems, hypertension, overweight, stroke, kidney disease, liver disease, anaemia, asthma, other lung condition, cancer, condition affecting the brain and nerves, weakened immune system/reduced ability to deal with infections, depression, anxiety, psychiatric disorder, none of these

§ Body Mass Index (BMI) formula:  $\text{weight (kg)} / (\text{height [m]})^2$

Supplementary Table 4: Prevalence of SARS-CoV-2 IgG antibodies, adults in England, by household income and age

| Age   | Household income                |                                   |                                   |                                   |
|-------|---------------------------------|-----------------------------------|-----------------------------------|-----------------------------------|
|       | £0-14,999                       | £15,000-49,999                    | £50,000-149,999                   | >£150,000                         |
| 18-24 | 72/1162 (5.78%, CI: 4.28-7.63)  | 299/4989 (5.53%, CI: 4.78-6.37)   | 424/5720 (7.24%, CI: 6.46-8.10)   | 73/741 (10.18%, CI: 7.84-13.02)   |
| 25-34 | 82/2049 (3.13%, CI: 2.21-4.27)  | 736/14483 (4.44%, CI: 4.02-4.88)  | 1089/16625 (6.21%, CI: 5.76-6.67) | 116/1174 (10.22%, CI: 8.32-12.43) |
| 35-44 | 131/2800 (3.95%, CI: 3.08-4.97) | 757/16309 (3.91%, CI: 3.53-4.31)  | 1137/22714 (4.34%, CI: 4.01-4.70) | 178/2896 (5.72%, CI: 4.73-6.84)   |
| 45-54 | 139/3546 (3.04%, CI: 2.32-3.87) | 1042/19665 (4.70%, CI: 4.33-5.09) | 1328/24419 (4.87%, CI: 4.53-5.22) | 256/3915 (6.19%, CI: 5.31-7.18)   |
| 55-64 | 215/5405 (3.11%, CI: 2.52-3.77) | 1153/24155 (4.06%, CI: 3.75-4.40) | 957/16910 (5.13%, CI: 4.72-5.56)  | 163/2094 (7.69%, CI: 6.40-9.17)   |
| 65-74 | 174/5503 (2.12%, CI: 1.60-2.72) | 687/21050 (2.25%, CI: 1.97-2.54)  | 228/6147 (2.78%, CI: 2.25-3.39)   | 13/416 (2.08%, CI: 0.52-4.67)     |
| 75+   | 95/2931 (2.22%, CI: 1.52-3.07)  | 223/7755 (1.78%, CI: 1.36-2.25)   | 45/1655 (1.59%, CI: 0.77-2.67)    | 6/124 (4.14%, CI: 1.01-10.55)     |



Supplementary Table 5 Infection Fatality Ratio sensitivity analyses including care home residents and all excess deaths

| Category     | Population (000s) | SARS-CoV-2 prevalence % [95% CI] | Confirmed COVID-19 deaths | All excess deaths | IFR based on COVID-19 deaths % [95% CI] | IFR based on excess deaths % [95% CI] |
|--------------|-------------------|----------------------------------|---------------------------|-------------------|-----------------------------------------|---------------------------------------|
| <b>Total</b> | 56,287            | 5.96 [5.70, 6.75]                | 48633                     | 53857             | 1.43 [1.37, 1.49]                       | 1.58 [1.51, 1.65]                     |
| <b>Sex</b>   |                   |                                  |                           |                   |                                         |                                       |
| Male         | 27,828            | 6.17 [5.76, 6.59]                | 26787                     | 28820             | 1.54 [1.43, 1.64]                       | 1.65 [1.54, 1.76]                     |
| Female       | 28,459            | 5.75 [5.42, 6.09]                | 21840                     | 25112             | 1.32 [1.24, 1.39]                       | 1.51 [1.42, 1.60]                     |
| <b>Age</b>   |                   |                                  |                           |                   |                                         |                                       |
| 15-44        | 21,335            | 7.20 [6.73, 7.66]                | 524                       | 550               | 0.03 [0.03, 0.04]                       | 0.04 [0.03, 0.04]                     |
| 45-64        | 14,406            | 6.18 [5.78, 6.58]                | 4657                      | 6315              | 0.52 [0.49, 0.55]                       | 0.70 [0.66, 0.75]                     |
| 65-74        | 5,576             | 3.16 [2.67, 3.66]                | 7105                      | 8288              | 3.87 [3.29, 4.46]                       | 4.49 [3.81, 5.16]                     |
| 75+          | 4,778             | 3.30 [2.53, 4.08]                | 36341                     | 38779             | 18.71 [15.13%, 22.29]                   | 19.72 [15.99, 23.45]                  |

Infection fatality ratios were calculated using confirmed COVID-19 deaths (including care home residents) and using excess (all-cause) deaths. Data on COVID-19 deaths and excess all-cause deaths were obtained from PHE Fingertips report, *Excess mortality in England, week ending 17 July 2020*. <https://fingertips.phe.org.uk/static-reports/mortality-surveillance/excess-mortality-in-england-week-ending-17-Jul-2020.html>

## Supplementary Methods

### Weighting strategy

The weighting approach used rim weighting to adjust to population estimates of: age by sex; Index of Multiple Deprivation (IMD) deciles; Local Authority (LA) counts; ethnic group. The age by sex and LA counts were extracted from the ONS mid-year population estimates (1), the ethnic group counts from the Labour Force Survey (Annual Population Survey) (2), and the IMD deciles profile were derived from the original anonymous population sampling frame from NHS digital. To allow for the different sources of population estimates, the rim weighting was carried out on the proportions rather than population totals. Age was grouped into seven categories: 18 to 24; 25 to 34; 35 to 44; 45 to 54; 55 to 64; 65 to 74; 75 or older. Age and sex groups had 14 categories. The reported ethnicity was grouped into nine categories: white; mixed / multiple ethnic groups; Indian; Pakistani; Bangladeshi; Chinese; any other Asian background; black African / Caribbean / other; and any other ethnic group or missing. The rim weighting was carried out in two stages. At the first stage, the sample was weighted to LA counts and age by sex groups only. This put the sample back into the correct proportion for LAs which corrects for the disproportionate sampling and differential non-response. In the same stage, the age and sex groups were also adjusted to make sure that the final weighted profile was as close to the population as possible. The second stage of rim weighting adjusted to all four measures, using the first stage weights as the starting weights. The adjustment factor between the first and second stage weights were trimmed at the 1<sup>st</sup> and 99<sup>th</sup> percentiles to dampen the extreme weights which improves efficiency. The final weights were calculated as the first stage weights multiplied by the trimmed adjustment factor for the second stage.

### Sample profile

The registration profile was monitored in relation to attributes: sex, age groups, and region which were included on the sample frame, but not others like ethnicity and occupation. As response rate exceeded expectation attempts to balance the registration profile through, for example, targeted reminders were not undertaken with weighting used to balance achieved responses from those completing the survey at the analysis stage. The age, sex and region profile of participants was broadly similar to the overall adult population profile of England. As in almost all population surveys, our study had unequal participation, with lower response among people from minority ethnic groups and in more deprived areas. We re-weighted the sample to account for such differential response.

## Sampling frame, response and weighting

|                                       | Population of England profile <sup>(1, 2)</sup> | Sample profile (%) | Registered - all (%) | Registered - for kit (%) | Completed survey - unweighted (%) | Completed survey - weighted (%) |
|---------------------------------------|-------------------------------------------------|--------------------|----------------------|--------------------------|-----------------------------------|---------------------------------|
| <b>Sex</b>                            |                                                 |                    |                      |                          |                                   |                                 |
| Male                                  | 48.9%                                           | 49.5%              | 44.6%                | 44.2%                    | 43.8%                             | 48.9%                           |
| Female                                | 51.1%                                           | 50.5%              | 55.4%                | 55.8%                    | 56.2%                             | 51.1%                           |
| <b>Age</b>                            |                                                 |                    |                      |                          |                                   |                                 |
| 18 to 24                              | 10.9%                                           | 10.2%              | 6.9%                 | 7.0%                     | 6.6%                              | 10.9%                           |
| 25 to 34                              | 17.3%                                           | 17.7%              | 13.7%                | 14.0%                    | 13.4%                             | 17.2%                           |
| 35 to 44                              | 16.1%                                           | 17.0%              | 16.5%                | 16.9%                    | 16.8%                             | 16.1%                           |
| 45 to 54                              | 17.5%                                           | 17.0%              | 19.6%                | 19.9%                    | 20.3%                             | 17.5%                           |
| 55 to 64                              | 15.0%                                           | 15.5%              | 19.7%                | 19.8%                    | 20.4%                             | 15.1%                           |
| 65 to 74                              | 12.6%                                           | 12.2%              | 15.7%                | 15.3%                    | 15.8%                             | 12.7%                           |
| 75+                                   | 10.5%                                           | 10.5%              | 7.9%                 | 7.0%                     | 6.6%                              | 10.6%                           |
| <b>Region</b>                         |                                                 |                    |                      |                          |                                   |                                 |
| North East                            | 4.8%                                            | 3.7%               | 3.7%                 | 3.6%                     | 3.6%                              | 4.8%                            |
| North West                            | 13.0%                                           | 12.4%              | 12.2%                | 12.2%                    | 12.0%                             | 13.0%                           |
| Yorkshire & Humber                    | 9.8%                                            | 6.3%               | 6.5%                 | 6.5%                     | 6.5%                              | 9.8%                            |
| East Midlands                         | 8.7%                                            | 11.9%              | 12.6%                | 12.6%                    | 12.6%                             | 8.7%                            |
| West Midlands                         | 10.5%                                           | 9.4%               | 9.6%                 | 9.6%                     | 9.6%                              | 10.4%                           |
| East of England                       | 11.1%                                           | 13.3%              | 14.4%                | 14.4%                    | 14.5%                             | 11.1%                           |
| London                                | 15.6%                                           | 15.3%              | 9.9%                 | 9.9%                     | 9.7%                              | 15.6%                           |
| South East                            | 16.3%                                           | 19.5%              | 21.7%                | 21.7%                    | 22.0%                             | 16.3%                           |
| South West                            | 10.2%                                           | 8.2%               | 9.4%                 | 9.4%                     | 9.5%                              | 10.3%                           |
| <b>IMD quintile</b>                   |                                                 |                    |                      |                          |                                   |                                 |
| 1                                     | 19.8%                                           | 17.4%              | 10.9%                | 10.8%                    | 10.2%                             | 19.4%                           |
| 2                                     | 20.9%                                           | 20.5%              | 16.4%                | 16.4%                    | 16.0%                             | 20.9%                           |
| 3                                     | 20.4%                                           | 21.2%              | 21.5%                | 21.5%                    | 21.6%                             | 20.5%                           |
| 4                                     | 19.7%                                           | 20.7%              | 24.4%                | 24.5%                    | 24.8%                             | 19.9%                           |
| 5                                     | 19.1%                                           | 20.2%              | 26.7%                | 26.8%                    | 27.4%                             | 19.3%                           |
| <b>Ethnicity</b>                      |                                                 |                    |                      |                          |                                   |                                 |
| White                                 | 86.3%                                           | NA                 | 92.2%                | 92.2%                    | 92.7%                             | 87.0%                           |
| Mixed/Multiple ethnic groups          | 1.1%                                            | NA                 | 1.4%                 | 1.4%                     | 1.4%                              | 1.1%                            |
| Indian                                | 2.9%                                            | NA                 | 2.0%                 | 2.0%                     | 1.9%                              | 2.9%                            |
| Pakistani                             | 1.9%                                            | NA                 | 0.6%                 | 0.6%                     | 0.5%                              | 1.7%                            |
| Bangladeshi                           | 0.8%                                            | NA                 | 0.2%                 | 0.2%                     | 0.2%                              | 0.7%                            |
| Chinese                               | 0.5%                                            | NA                 | 0.4%                 | 0.4%                     | 0.4%                              | 0.5%                            |
| Any other Asian background            | 1.2%                                            | NA                 | 0.8%                 | 0.8%                     | 0.7%                              | 1.3%                            |
| Black/African/Caribbean/Black British | 3.3%                                            | NA                 | 1.1%                 | 1.1%                     | 0.9%                              | 2.8%                            |
| Other ethnic group / Don't know       | 1.9%                                            | NA                 | 1.4%                 | 1.4%                     | 1.3%                              | 1.8%                            |

### Study response rates

|                          | Round 1 (Jun 20–Jul 13) | % of all invited |
|--------------------------|-------------------------|------------------|
| Invitation letters sent* | 314,996                 |                  |
| Registered <sup>†</sup>  | 126,143                 | 40.0%            |
| Requested test kit       | 121,976                 | 38.7%            |
| Completed survey         | 109,076                 | 34.6%            |
| Attempted test           | 107,640                 | 34.2%            |
| Completed test           | 105,651                 | 33.5%            |
| Valid test               | 99,908                  | 31.7%            |

\*The number of invitations sent out was based on an assumed response rate of 38%.

<sup>†</sup>Registration was stopped when target reached approx. 120,000 to ensure sufficient test kits would be available, and therefore overall response rate is artificially capped.

## Regions of England

England is the largest of the four geographical areas making up the United Kingdom, the other three being devolved nations of Northern Ireland, Scotland and Wales. England is further divided into nine administrative regions: North East, North West, Yorkshire, East Midlands, West Midlands, East of England, London, South East, South West. The regions are the highest tier of sub-national division in England and are used for statistical and some administrative purposes. In the table below some key demographic characteristics of the regions are provided.

### Selected characteristics of Regions of England

|                      | Population <sup>(1)</sup> | Area (km <sup>2</sup> ) <sup>(1)</sup> | Population density (per km <sup>2</sup> ) <sup>(1)</sup> | Median gross annual earnings (£) in 2019 <sup>(2)</sup> | % population claiming income support in Aug 2019 <sup>(3)</sup> (n) |
|----------------------|---------------------------|----------------------------------------|----------------------------------------------------------|---------------------------------------------------------|---------------------------------------------------------------------|
| North East           | 2,669,941                 | 8,579                                  | 311                                                      | 27,187                                                  | 0.89 (23,711)                                                       |
| North West           | 7,341,196                 | 14,108                                 | 520                                                      | 28,137                                                  | 0.63 (46,409)                                                       |
| Yorkshire and Humber | 5,502,967                 | 15,405                                 | 357                                                      | 27,835                                                  | 0.70 (38,272)                                                       |
| East Midlands        | 4,835,928                 | 15,625                                 | 309                                                      | 28,000                                                  | 0.56 (26,896)                                                       |
| West Midlands        | 5,934,037                 | 12,998                                 | 457                                                      | 28,536                                                  | 0.69 (40,848)                                                       |
| East of England      | 6,236,072                 | 19,116                                 | 326                                                      | 30,345                                                  | 0.45 (28,363)                                                       |
| London               | 8,961,989                 | 1,572                                  | 5,701                                                    | 38,992                                                  | 0.58 (52,266)                                                       |
| South East           | 9,180,135                 | 19,072                                 | 481                                                      | 32,120                                                  | 0.42 (38,664)                                                       |
| South West           | 5,624,696                 | 23,836                                 | 236                                                      | 28,654                                                  | 0.39 (21,721)                                                       |

<sup>1</sup> Office\_for\_National\_Statistics. Population estimates for the UK, England and Wales, Scotland and Northern Ireland: mid-2019 2020 [Available from:

<https://www.ons.gov.uk/releases/populationestimatesfortheukenglandandwalesscotlandandnorthernirelandmid2019>

<sup>2</sup> Office\_for\_National\_Statistics. Employee earnings in the UK: 2019 2019 [Available from:

<https://www.ons.gov.uk/releases/employeeearningsintheuk2019>.

<sup>3</sup> Department\_for\_Work\_and\_Pensions. DWP benefits statistics 2019 [Available from:

<https://www.gov.uk/government/collections/dwp-statistical-summaries>.

Map showing Regions of England with prevalence of SARS-CoV-2 antibody

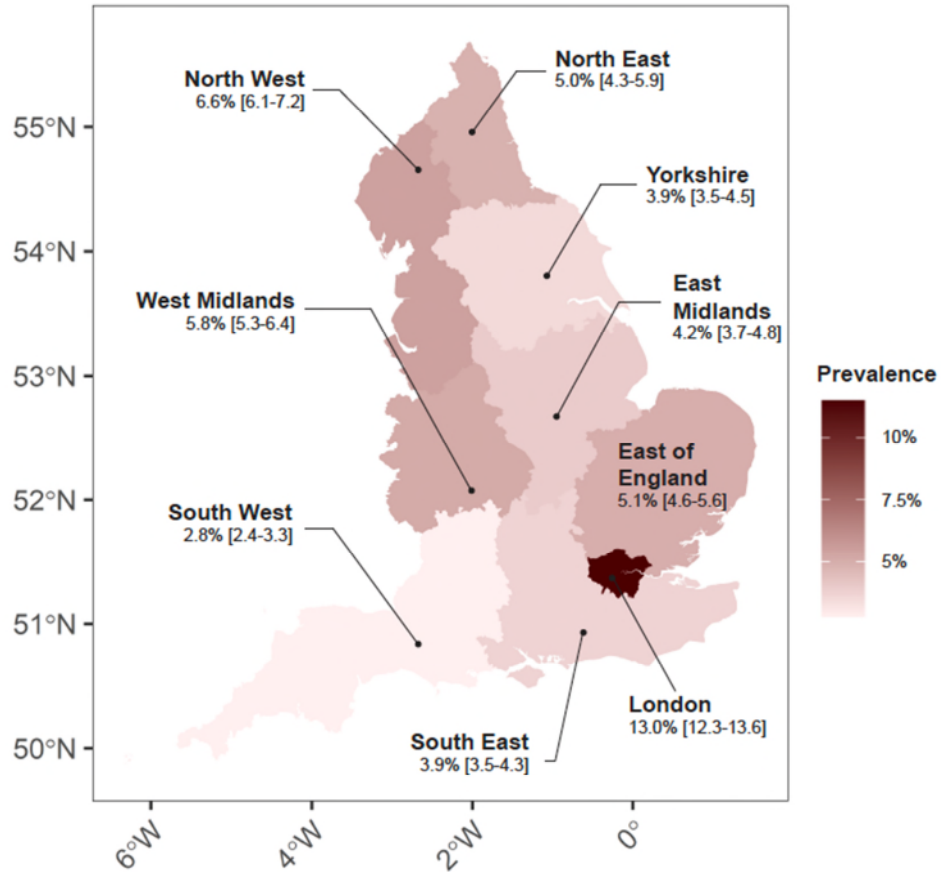

Source: Map generated from Office for National Statistics licensed under the Open Government Licence v.3.0. Contains OS data © Crown copyright and database right [2020]. Source data in Supplementary Data 1.

## Missing data

In the final data set used for analysis, 8 variables had missing data that was not a logical consequence of skip patterns in the questionnaire as shown in the plot below. The only variable with large amount of missing data was BMI, which is computed from self-reported weight (11514 missing) and height (4741 missing) leading to 11% with a missing BMI.

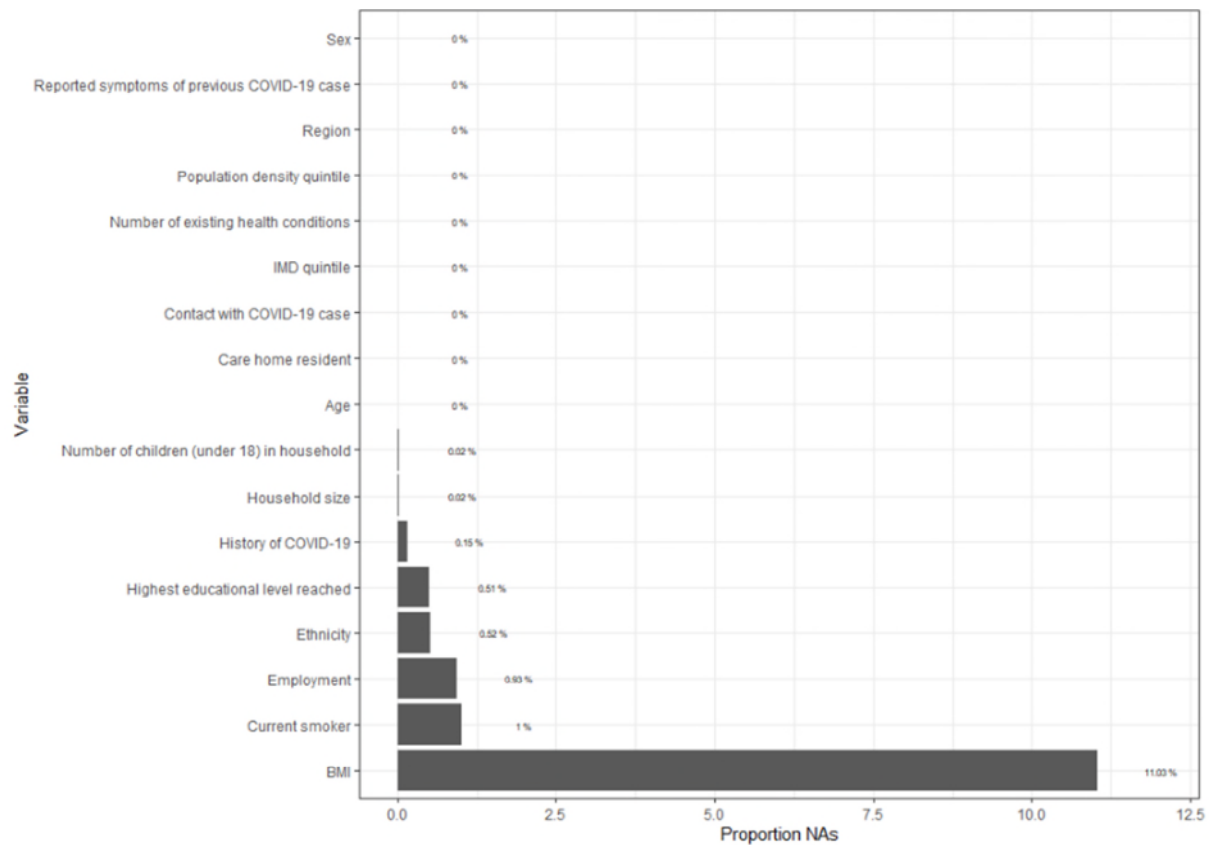

Supplement: 41467_2021_21237_MOESM1_ESM.pdf [file 41467_2021_21237_MOESM1_ESM.pdf]
